# Supplementary material for: Mapping 24 woody plant species phenology and ground forest phenology over China from 1951 to 2020
Source: Copernicus journal article supplement (doi:10.5194/essd-16-277-2024), 2024-01-11
Supplement: Supplementary file 1 [file essd-16-277-2024-supplement.pdf]

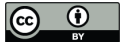

*Supplement of*

## **Mapping 24 woody plant species phenology and ground forest phenology over China from 1951 to 2020**

**Mengyao Zhu et al.**

*Correspondence to:* Junhu Dai ([daijh@igsnr.ac.cn](mailto:daijh@igsnr.ac.cn)) and Quansheng Ge ([geqs@igsnr.ac.cn](mailto:geqs@igsnr.ac.cn))

The copyright of individual parts of the supplement might differ from the article licence.

**Table S1:** List of 12 bioclimatic layers selected as environmental data inputs for the species distribution model.

| No. | Short name | Long name                                                         | Unit                               | Explanation                                                                                                                                                                                   |
|-----|------------|-------------------------------------------------------------------|------------------------------------|-----------------------------------------------------------------------------------------------------------------------------------------------------------------------------------------------|
| 1   | bio1       | mean annual air temperature                                       | °C                                 | mean annual daily mean air temperatures averaged over 1 year                                                                                                                                  |
| 2   | bio2       | mean diurnal air temperature range                                | °C                                 | mean diurnal range of temperatures averaged over 1 year                                                                                                                                       |
| 3   | bio3       | isothermality                                                     | °C                                 | ratio of diurnal variation to annual variation in temperatures                                                                                                                                |
| 4   | bio5       | mean daily maximum air temperature of the warmest month           | °C                                 | the highest temperature of any monthly daily mean maximum temperature                                                                                                                         |
| 5   | bio6       | mean daily minimum air temperature of the coldest month           | °C                                 | the lowest temperature of any monthly daily mean maximum temperature                                                                                                                          |
| 6   | bio12      | annual precipitation amount                                       | kg m <sup>-2</sup>                 | accumulated precipitation amount over 1 year                                                                                                                                                  |
| 7   | gdd5       | growing degree days heat sum above 5°C                            | °C                                 | heat sum of all days above the 5°C temperature accumulated over 1 year                                                                                                                        |
| 8   | gdd10      | growing degree days heat sum above 10°C                           | °C                                 | heat sum of all days above the 10°C temperature accumulated over 1 year                                                                                                                       |
| 9   | gsp        | accumulated precipitation amount on growing season days TREELIM   | kg m <sup>-2</sup>                 | precipitation sum accumulated on all days during the growing season based on TREELIM<br>( <a href="https://doi.org/10.1007/s00035-014-0124-0">https://doi.org/10.1007/s00035-014-0124-0</a> ) |
| 10  | hurs_mean  | mean monthly near-surface relative humidity                       | %                                  | average monthly near-surface relative humidity over 1 year                                                                                                                                    |
| 11  | rsds_mean  | mean monthly surface downwelling shortwave flux in air            | MJ m <sup>-2</sup> d <sup>-1</sup> | average monthly surface downwelling shortwave flux in air over 1 year                                                                                                                         |
| 12  | rsds_range | annual range of monthly surface Downwelling shortwave flux in air | MJ m <sup>-2</sup> d <sup>-1</sup> | difference between maximum and minimum monthly surface downwelling shortwave flux in air                                                                                                      |

**Table S2:** List of simulated data and results of species distribution for 24 species. Number of records represents the total number of occurrence records used when simulating the distribution of each species. AUC represents the area under the ROC curve, which indicates the accuracy of the simulation results of species distribution.

| No.   | Species                               | Family        | Life form | Number of records | AUC   |
|-------|---------------------------------------|---------------|-----------|-------------------|-------|
| 1     | <i>Ginkgo biloba</i>                  | Ginkgoaceae   | Tree      | 235               | 0.879 |
| 2     | <i>Metasequoia glyptostroboides</i>   | Cupressaceae  | Tree      | 28                | 0.860 |
| 3     | <i>Magnolia denudata</i>              | Magnoliaceae  | Tree      | 93                | 0.898 |
| 4     | <i>Salix babylonica</i>               | Salicaceae    | Tree      | 240               | 0.773 |
| 5     | <i>Populus × canadensis</i>           | Salicaceae    | Tree      | 17                | 0.747 |
| 6     | <i>Robinia pseudoacacia</i>           | Fabaceae      | Tree      | 100               | 0.829 |
| 7     | <i>Albizia julibrissin</i>            | Fabaceae      | Tree      | 124               | 0.890 |
| 8     | <i>Cercis chinensis</i>               | Fabaceae      | Shrub     | 103               | 0.864 |
| 9     | <i>Prunus armeniaca</i>               | Rosaceae      | Tree      | 165               | 0.822 |
| 10    | <i>Ulmus pumila</i>                   | Ulmaceae      | Tree      | 108               | 0.796 |
| 11    | <i>Morus alba</i>                     | Moraceae      | Tree      | 232               | 0.769 |
| 12    | <i>Broussonetia papyrifera</i>        | Moraceae      | Tree      | 607               | 0.835 |
| 13    | <i>Quercus acutissima</i>             | Fagaceae      | Tree      | 102               | 0.850 |
| 14    | <i>Pterocarya stenoptera</i>          | Juglandaceae  | Tree      | 242               | 0.870 |
| 15    | <i>Juglans regia</i>                  | Juglandaceae  | Tree      | 195               | 0.826 |
| 16    | <i>Betula platyphylla</i>             | Betulaceae    | Tree      | 229               | 0.886 |
| 17    | <i>Acer pictum</i> subsp. <i>mono</i> | Sapindaceae   | Tree      | 171               | 0.818 |
| 18    | <i>Ailanthus altissima</i>            | Simaroubaceae | Tree      | 241               | 0.837 |
| 19    | <i>Melia azedarach</i>                | Meliaceae     | Tree      | 292               | 0.871 |
| 20    | <i>Firmiana simplex</i>               | Malvaceae     | Tree      | 124               | 0.861 |
| 21    | <i>Hibiscus syriacus</i>              | Malvaceae     | Shrub     | 268               | 0.868 |
| 22    | <i>Fraxinus chinensis</i>             | Oleaceae      | Tree      | 253               | 0.825 |
| 23    | <i>Syringa oblata</i>                 | Oleaceae      | Shrub     | 76                | 0.902 |
| 24    | <i>Paulownia fortunei</i>             | Paulowniaceae | Tree      | 126               | 0.912 |
| Total |                                       | -             | -         | 4371              | 0.845 |

**Table S3:** Comparison results of GP maps and two LSP products in different forest type areas, which was made between FLD and SOS in spring and LCD and EOS in autumn within the time range 1981-2014 and 2013-2020. Forest type includes deciduous forest (DF), mix forest (MF), and evergreen forest (EF). LSP product includes VIPPHEN product (P1) and VNP22C2 product (P2). Method represents the aggregation method of GP maps, including mean, pct50, pct20/80 and pct10/90.  $r$ , RMSE, MAE,  $b_0$ , and  $n$  represents Pearson correlation coefficient, root mean square error, mean absolute error, linear regression slope, and number of comparing pixels, respectively.

| Forest type | LSP product | GP vs. LSP | Method | $r$   | RMSE | MAE  | $b_0$ | $n$  |
|-------------|-------------|------------|--------|-------|------|------|-------|------|
| DF          | P1          | FLD-SOS    | mean   | 0.830 | 25.3 | 23.5 | 0.452 | 3810 |
| DF          | P1          | FLD-SOS    | pct50  | 0.811 | 25.0 | 23.2 | 0.462 | 3809 |
| DF          | P1          | FLD-SOS    | pct20  | 0.809 | 21.1 | 18.0 | 0.375 | 3810 |
| DF          | P1          | FLD-SOS    | pct10  | 0.819 | 20.8 | 17.7 | 0.337 | 3810 |
| DF          | P2          | FLD-SOS    | mean   | 0.947 | 12.1 | 10.8 | 0.772 | 3821 |
| DF          | P2          | FLD-SOS    | pct50  | 0.939 | 11.6 | 10.5 | 0.794 | 3821 |
| DF          | P2          | FLD-SOS    | pct20  | 0.942 | 8.8  | 7.5  | 0.678 | 3821 |
| DF          | P2          | FLD-SOS    | pct10  | 0.945 | 9.9  | 8.6  | 0.602 | 3821 |
| DF          | P1          | LCD-EOS    | mean   | 0.618 | 39.3 | 37.9 | 0.577 | 3710 |
| DF          | P1          | LCD-EOS    | pct50  | 0.640 | 42.7 | 41.3 | 0.557 | 3748 |
| DF          | P1          | LCD-EOS    | pct80  | 0.658 | 35.5 | 34.1 | 0.579 | 3699 |
| DF          | P1          | LCD-EOS    | pct90  | 0.664 | 32.9 | 31.5 | 0.563 | 3663 |
| DF          | P2          | LCD-EOS    | mean   | 0.857 | 21.3 | 19.7 | 1.086 | 3731 |
| DF          | P2          | LCD-EOS    | pct50  | 0.866 | 24.7 | 23.4 | 1.069 | 3772 |
| DF          | P2          | LCD-EOS    | pct80  | 0.884 | 17.8 | 16.3 | 1.082 | 3703 |
| DF          | P2          | LCD-EOS    | pct90  | 0.874 | 15.1 | 13.5 | 0.968 | 3664 |
| MF          | P1          | FLD-SOS    | mean   | 0.407 | 35.8 | 30.1 | 0.368 | 1808 |
| MF          | P1          | FLD-SOS    | pct50  | 0.412 | 35.8 | 30.3 | 0.373 | 1808 |
| MF          | P1          | FLD-SOS    | pct20  | 0.353 | 33.5 | 25.3 | 0.300 | 1808 |
| MF          | P1          | FLD-SOS    | pct10  | 0.362 | 33.5 | 24.6 | 0.292 | 1808 |
| MF          | P2          | FLD-SOS    | mean   | 0.377 | 28.5 | 18.8 | 0.313 | 1659 |
| MF          | P2          | FLD-SOS    | pct50  | 0.362 | 28.9 | 19.3 | 0.299 | 1659 |

|    |    |         |       |        |       |      |        |      |
|----|----|---------|-------|--------|-------|------|--------|------|
| MF | P2 | FLD-SOS | pct20 | 0.370  | 30.8  | 19.4 | 0.296  | 1659 |
| MF | P2 | FLD-SOS | pct10 | 0.388  | 33.4  | 22.2 | 0.294  | 1659 |
| MF | P1 | LCD-EOS | mean  | 0.245  | 43.9  | 37.0 | 0.202  | 1559 |
| MF | P1 | LCD-EOS | pct50 | 0.275  | 44.1  | 37.5 | 0.246  | 1559 |
| MF | P1 | LCD-EOS | pct80 | 0.223  | 47.2  | 41.0 | 0.153  | 1559 |
| MF | P1 | LCD-EOS | pct90 | 0.190  | 48.5  | 41.6 | 0.128  | 1559 |
| MF | P2 | LCD-EOS | mean  | 0.312  | 41.9  | 33.7 | 0.312  | 1647 |
| MF | P2 | LCD-EOS | pct50 | 0.331  | 38.9  | 31.8 | 0.358  | 1647 |
| MF | P2 | LCD-EOS | pct80 | 0.264  | 51.9  | 40.2 | 0.218  | 1647 |
| MF | P2 | LCD-EOS | pct90 | 0.233  | 56.2  | 43.1 | 0.187  | 1647 |
| EF | P1 | FLD-SOS | mean  | 0.407  | 39.5  | 35.0 | 0.603  | 1507 |
| EF | P1 | FLD-SOS | pct50 | 0.445  | 38.2  | 33.6 | 0.651  | 1507 |
| EF | P1 | FLD-SOS | pct20 | 0.324  | 35.9  | 30.7 | 0.478  | 1522 |
| EF | P1 | FLD-SOS | pct10 | 0.290  | 35.2  | 29.3 | 0.429  | 1529 |
| EF | P2 | FLD-SOS | mean  | -0.269 | 49.6  | 42.7 | -0.326 | 1670 |
| EF | P2 | FLD-SOS | pct50 | -0.232 | 51.4  | 44.7 | -0.274 | 1666 |
| EF | P2 | FLD-SOS | pct20 | -0.295 | 57.9  | 50.9 | -0.366 | 1683 |
| EF | P2 | FLD-SOS | pct10 | -0.281 | 61.5  | 54.6 | -0.351 | 1693 |
| EF | P1 | LCD-EOS | mean  | 0.536  | 38.9  | 29.1 | 0.654  | 2032 |
| EF | P1 | LCD-EOS | pct50 | 0.495  | 38.5  | 29.0 | 0.585  | 2033 |
| EF | P1 | LCD-EOS | pct80 | 0.469  | 48.2  | 37.9 | 0.550  | 2029 |
| EF | P1 | LCD-EOS | pct90 | 0.463  | 51.8  | 40.5 | 0.572  | 2031 |
| EF | P2 | LCD-EOS | mean  | 0.226  | 86.6  | 76.0 | 0.280  | 1562 |
| EF | P2 | LCD-EOS | pct50 | 0.247  | 79.6  | 68.6 | 0.307  | 1562 |
| EF | P2 | LCD-EOS | pct80 | 0.136  | 100.3 | 88.7 | 0.164  | 1562 |
| EF | P2 | LCD-EOS | pct90 | 0.102  | 105.6 | 94.1 | 0.127  | 1558 |

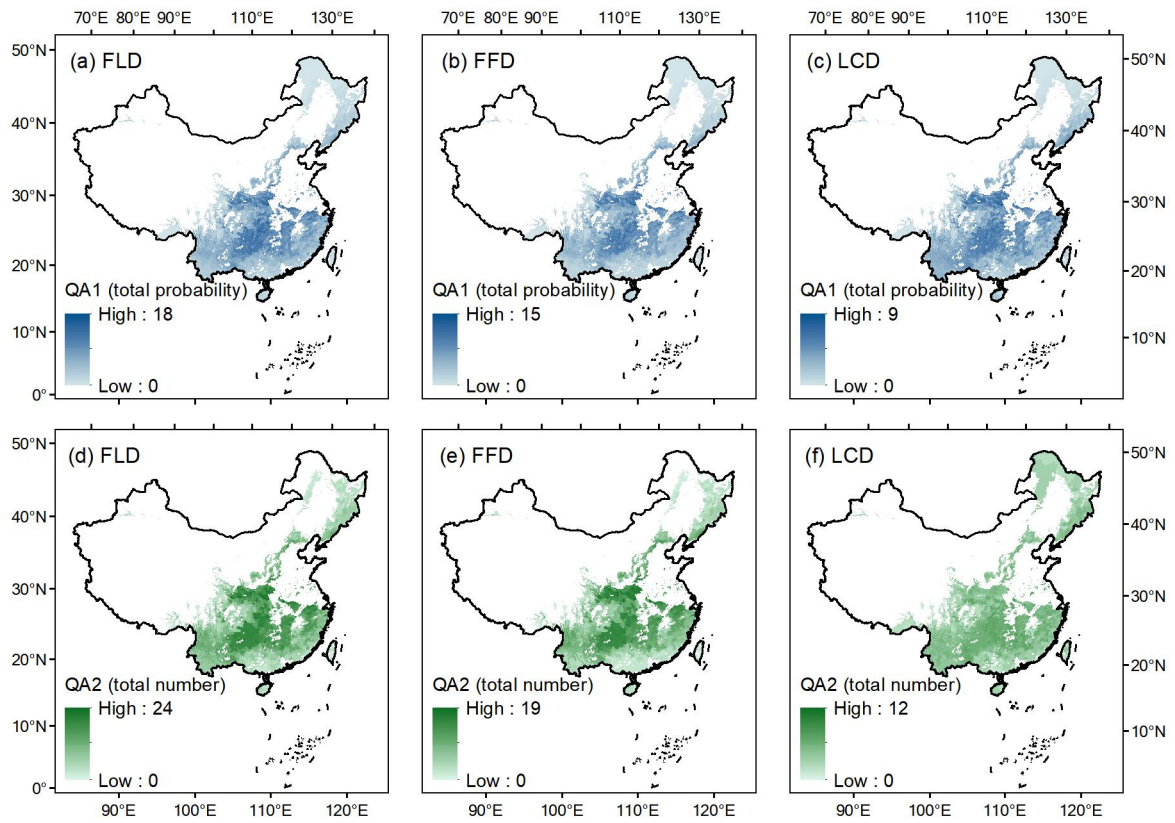

**Figure S1:** Quality assurance (QA) maps used to evaluate the reliability of the aggregation results of GP maps. (a-c) QA1 maps of FLD, FFD and LCD, showing the total distribution probability of all species. (d-f) QA2 maps of FLD, FFD and LCD, showing the total number of species with distribution probabilities greater than 0.1.

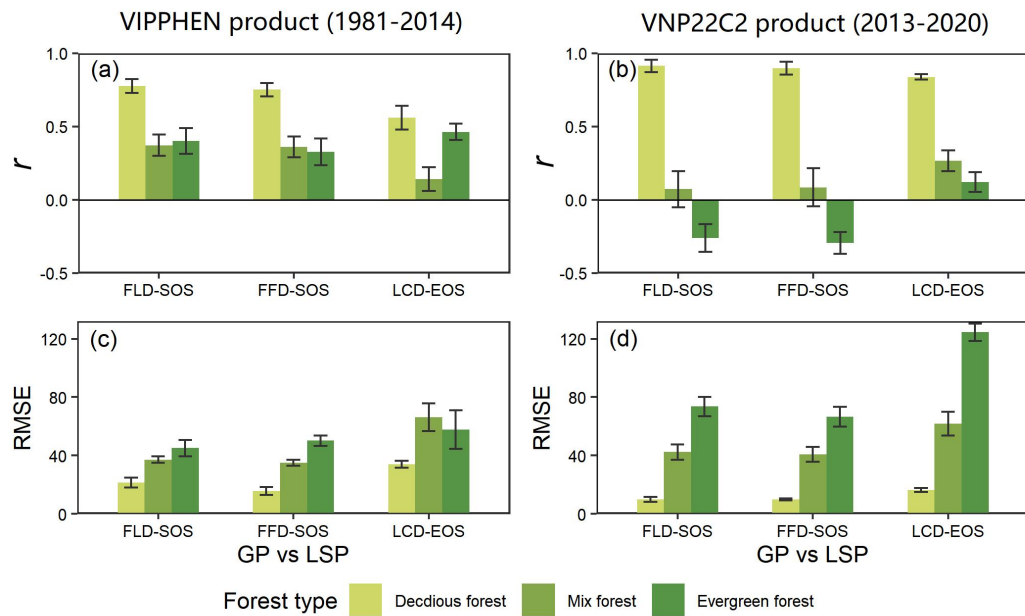

**Figure S2:** Comparison results of GP maps and two LSP products (VIPPHEN and VNP22C2) in different forest type areas, which was made between FLD (or FFD) and SOS in spring and between LCD and EOS in autumn within the time range 1981-2014 and 2013-2020. (a-b)  $R$  between LSP and GP under the best aggregating method in three forest types; (c-d) RMSE between LSP and GP under the best aggregating method in three forest types. Each forest type is represented by a different color. The error bar in the bar plot represents the multi-year standard deviation.

**S1:** Model formulations of three spring phenology models (Unichill, Unified, temporal-spatial coupling (TSC)), and two autumn phenology models (the multiple regression (MR) model, temperature-photoperiod (TP)).

**(1) Unichill model:** the model divides the process of bud burst into two phases: dormancy and quiescence, with nine species-specific parameters ( $a, b, c, d, e, w, k, C^*$  and  $t_c$ ) fitted on phenological observations (Chuine, 2000). Parameters  $a, b$ , and  $c$  define the response function of chilling units ( $R_c(x_t)$ ; eq. (1)). Parameters  $d$  and  $e$  define the response function of forcing units ( $R_f(x_t)$ ; eq. (2)). Parameter  $t_0$  is the time when  $R_c(x_t)$  begins to accumulate, which determines the threshold of chilling accumulation ( $C^*$ ; eq. (3)). Parameters  $w, k, t_c$  determine the threshold of the forcing accumulation ( $F^*$ ; eq. (4)). When it reaches the threshold, the time  $t_b$  is FLD or FFD.

$$R_c(x_t) = \frac{1}{1 + e^{a(x_t - c)^2 + b(x_t - c)}} \quad (1)$$

$$R_f(x_t) = \frac{1}{1 + e^{d(x_t - e)}} \quad (2)$$

$$\sum_{t_0}^{t_1} R_c(x_t) = C^* \quad (3)$$

$$\sum_{t_1}^{t_b} R_f(x_t) = F^*, \text{ where } F^* = w e^{k C_{tot}}, \quad C_{tot} = \sum_{t_0}^{t_c} R_c(x_t) \quad (4)$$

**(2) UniChill model:** it is a simplified version of Unified model, which contains seven parameters:  $a, b, c, d, e, C^*$  and  $F^*$  (Chuine, 2000). On the basis of Unified model, this model fixes the start time  $t_1$  for of the forcing unit as September 1 of the previous year, and fixes the forcing accumulation ( $F^*$ ) required for the start of the spring phenology every year.

**(3) TSC model:** the model is built on SW model (Hunter and Lechowicz, 1992; eq. (5, 6)), which uses the winter average temperature to determine the threshold of the forcing accumulation (Ge et al., 2014; eq. (7)). The model includes six parameters:  $T_{b1}, F^*, t_0, a, b$  and  $f$ .  $R_f(x_t)$  is the forcing unit,  $x_t$  is the average daily temperature on day  $t$ , and  $T_{b1}$  is the critical temperature.  $F^*$  is the threshold value of temperature accumulation. The temperature accumulation threshold  $F_i$  of different sites is determined by the winter (December of the previous year to February) temperature  $\bar{T}_i^{WI}$  of site  $i$  and parameters  $a, b, f$ . Parameter  $t_0$  is the time when the forcing unit begins to accumulate, and the time  $y$  is FLD or FFD when it reaches  $F^*$ .

$$R_f(x_t) = \begin{cases} 0 & x \leq T_{b1} \\ x_t - T_{b1} & x \geq T_{b1} \end{cases} \quad (5)$$

$$\sum_{t_0}^y R_f(x_t) = F^* \quad (6)$$

$$F_i = a + b \times e^{\frac{\bar{T}_i^{WI}}{f}} \quad (7)$$



**(4) MR model:** the influence of average temperature on autumn LCD is discrepant in different months. The rising temperature in May and June may lead to the advance of LCD, while the rising temperature in August and September may lead to the delay of LCD (Estrella and Menzel, 2006). A multiple regression model (eq. (8)) was established based on the correlation ( $R_5$ - $R_9$ ) between LCD ( $P_l$ ) and average temperature from May to September ( $T_5$ - $T_9$ ), where  $a$ ,  $b$ ,  $c$ ,  $d$  and  $e$  are model coefficients and  $\varepsilon$  is constant term.

$$P_l = aT_5 + bT_6 + cT_7 + dT_8 + eT_9 + \varepsilon, \text{ if } |R_{5,6,7,8,9}| < 0.3 \quad a, b, c, d, e = 0 \quad (8)$$

**(5) TP model:** assuming that the autumn LCD is affected by both temperature and photoperiod (Delpierre et al., 2009). When photoperiod is lower than the threshold  $P_{start}$ , cold state  $CDD(d)$  starts to accumulate (eq. (9)). When the accumulated  $iCDD(d)$  exceeds the threshold  $Y_{crit}$ , the day  $d$  is the exact date of leaf coloring ( $Y_{mod}$ , eq. (10)). Daily cold state  $CDD(d)$  is co-determined by daily temperature  $T(d)$  and daily photoperiod  $P(d)$  (eq. (11,12)). The model includes five parameters:  $P_{start}$ ,  $Y_{crit}$ ,  $T_b$ ,  $x$  and  $y$ .

$$iCDD(d) = \begin{cases} 0 & P(d) \geq P_{start} \\ CDD(d-1) + CDD(d) & P(d) < P_{start} \end{cases} \quad (9)$$

$$Y_{mod} = d, iCDD(d) \geq Y_{crit} \quad (10)$$

$$\text{if } P(d) < P_{start}, CDD(d) = \begin{cases} 0 & T(d) \geq T_b \\ [T_b - T(d)]^x \times f[P(d)]^y & T(d) < T_b \end{cases} \quad (11)$$

$$f[P(d)] = \frac{P(d)}{P_{start}} \quad \text{or} \quad f[P(d)] = 1 - \frac{P(d)}{P_{start}} \quad (12)$$

Where  $x$  and  $y$  can take values 0, 1 or 2 respectively. Among them,  $x=0$  or  $y=0$  indicates that LCD is independent of temperature or photoperiod;  $x=1$  or  $y=1$  indicates that LCD is linearly related to temperature or photoperiod;  $x=2$  or  $y=2$  indicates a nonlinear correlation with temperature or photoperiod.

## References

- Chuine, I.: A unified model for budburst of trees, *J. Theor. Biol.*, 207, 337–347, <https://doi.org/10.1006/jtbi.2000.2178>, 2000.
- Delpierre, N., Dufrêne, E., Soudani, K., Ulrich, E., Cecchini, S., Boé, J., and François, C.: Modelling interannual and spatial variability of leaf senescence for three deciduous tree species in France, *Agric. For. Meteorol.*, 149, 938–948, <https://doi.org/10.1016/j.agrformet.2008.11.014>, 2009.
- Estrella, N. and Menzel, A.: Responses of leaf colouring in four deciduous tree species to climate and weather in Germany, *Clim. Res.*, 32, 253–267, <https://doi.org/10.3354/cr032253>, 2006.

Hunter, A. F. and Lechowicz, M. J.: Predicting the timing of budburst in temperate trees, *J. Appl. Ecol.*, 597–604, <https://doi.org/10.2307/2404467>, 1992.

Ge, Q., Wang, H., and Dai, J.: Simulating changes in the leaf unfolding time of 20 plant species in China over the twenty-first century, *Int. J. Biometeorol.*, 58, 473–484, <https://doi.org/10.1007/s00484-013-0671-x>, 2014.
